# Supplementary material for: Plasmon-Induced Fluorescence Enhancement in Aminoporphyrin Thin Film Coupled with Gold Nanocubes Array
Source: Research Square preprint supplement (doi:10.21203/rs.3.rs-8249792/v1), 2025-12-12
Supplement: Supplementary file 1 [file 7b1016f4cd980c963f39e538.docx]

*Supporting Information*

**Plasmon-Induced Fluorescence Enhancement in Aminoporphyrin Thin Film Coupled with Gold Nanocubes Array**

Giuseppe Di Maio a, Caterina Damiano c, Emma Gallo c, and Massimo La Deda *,a, b

*a Department of Chemistry and Chemical Technology, University of Calabria, Rende (CS), Italy.*

*E-mail: massimo.ladeda@unical.it*

*b Consiglio Nazionale delle Ricerche - Istituto di Nanotecnologia CNR-Nanotec, Rende (CS), Italy.*

*c Department of Chemistry, University of Milan, Via Golgi 19, I-20133, Milan, Italy*

1. **Materials and methods**

All chemicals were purchased from Sigma-Aldrich and used as received, without further purification. Milli-Q water (resistivity 18.2 MΩ·cm at 25 °C) was used. The glass slide used for this experiment (Carlo Erba, 26 x 76 x 0.8 mm) was hand-cut to obtain a 1.5 x 2 cm2 surface. Before use, the glass slide was washed with three different solvents, i.e. H2O, EtOH, and C3H6O, in an ultrasonic bath for 15 minutes each and dried in the air.

1. **AuNC monolayer preparation[1]**

2 mL of an aqueous dispersion of gold nanocubes coated with CTAB (AuNC@CTAB, 3.25 × 10-4 M ) and 2 mL of 4.0 × 10-5 M 1-dodecanethiol in hexane were added in sequence into a Petri Dish (2.8 cm diameter), to create a water/oil interface. After the water/oil interface was formed, using a 600 mL syringe, 1.2 mL of EtOH was slowly injected into the aqueous phase at the centre of the Petri dish to destabilize AuNC colloidal dispersion. As the volume fraction of EtOH in the aqueous phase increases, an increasingly large golden layer of AuNP starts to form at the interface, accompanied by the simultaneous discoloration of the aqueous phase. At this point, the Petri dish was placed in a hexane-saturated chamber to ensure the slow evaporation of the solvent, which, combined with the surface functionalization of AuNC with 1-dodecanethiol, compacted the layer. After the hexane evaporation, the layer remains located at the water/air interface, behaving as a single body; the obtained AuNC monolayer was transferred onto a glass slide through the horizontal lifting technique.[2]

1. **Photophysical measurements**

A Perkin Elmer Lambda 900 spectrophotometer was employed to register the absorption and extinction spectra of the samples. Steady-state emission spectra were recorded on an Edinburgh FLS100-SS-tt spectrometer equipped with a 450 W Xenon lamp (Xe2), single excitation and single emission 325 mm focal length monochromators in Czerny Turner configuration (1.7 nm/mm dispersion; 1800 grooves/mm), an MCP-900 PMT detector in fan assisted TE cooled housing, and excitation and emission automated Glen-Thompson polarisers. Emission and excitation spectra were corrected for source intensity (lamp and grating) and emission spectral response (detector and grating) by standard correction curves. Emission spectra were collected in a right angle geometry (45°) with a 610 nm cut-off filter in emission to cut all reflection signals generated from the excitation source. The irradiation of the sample was performed from the glass side, to excite the dye first. This choice is due to the high AuNC monolayer reflectivity that reduces the excitation light that reaches the NH2TPPH2 film, decreasing the signal/noise ratio.

1. **References**

1. Di Maio G, Termine R, La Deda M (2025) Gold Nanocube Monolayers: From Synthesis and Self-Assembly to Conductive Thin Films. Langmuir. https://doi.org/10.1021/acs.langmuir.5c03960

2. Talham DR, Yamamoto T, Meisel MW (2008) Langmuir–Blodgett films of molecular organic materials. Journal of Physics: Condensed Matter 20:184006. https://doi.org/10.1088/0953-8984/20/18/184006
